# Supplementary material for: B cell repertoires in HLA-sensitized kidney transplant candidates undergoing desensitization therapy
Source: Springer Nature journal article supplement (doi:10.1186/s12967-017-1118-7), 2017-01-13

**a**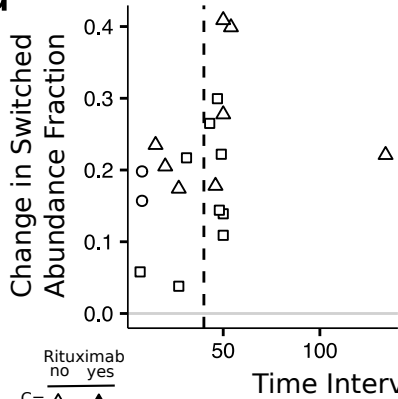**b**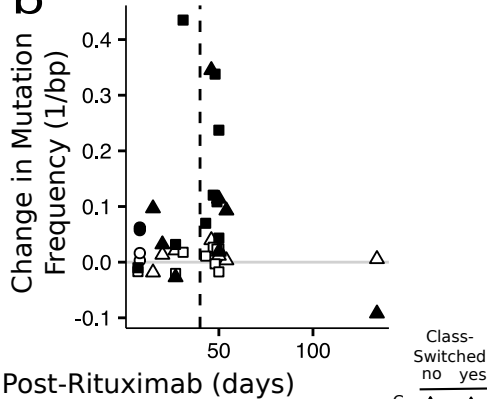**c**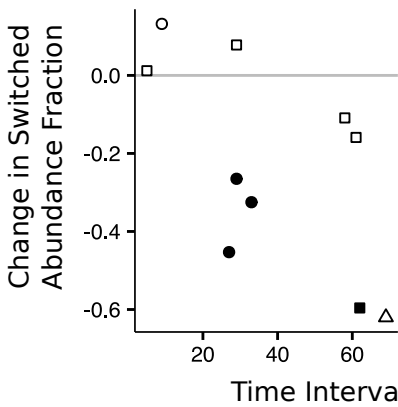**d**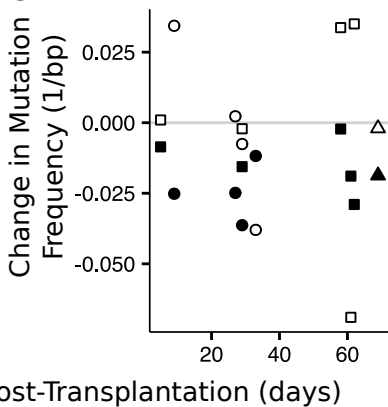

Supplement: MOESM4 [file 11998508]
